# Supplementary material for: Flotillin-2 promotes cell proliferation via activating the c-Myc/BCAT1 axis by suppressing miR-33b-5p in nasopharyngeal carcinoma
Source: publisher site journal article supplement (doi:10.18632/aging.202726), 2021-03-19
Supplement: Supplementary file [file aging-v13i6-202726-supplementary-material-SD2.pdf]

**Supplementary Table 1. qPCR primers in this study.**

| <b>Name</b>          | <b>Primer sequence</b>                                              |
|----------------------|---------------------------------------------------------------------|
| miR-33b-5p           | Cat.#, miRA1000051-1                                                |
| 5S                   | Cat.#, miRAN0001-1                                                  |
| BCAT1<br>(NM_005504) | F:5'-AGCCCTGCTCTTTGTA CTCTT-3'<br>R:5'-CCAGGCTCTTACATACTTGGGA-3'    |
| c-Myc<br>(NM_002467) | F: 5'-CCTACCCTCTCAACGACAGC-3'<br>R: 5'-TTCCTCCTCAGAGTCGCTGC-3'      |
| hnc-Myc Intron-1     | F:5'- ATTTCTGACAGCCGGAGACG -3'<br>R:5'- CCCAACACCACGTCCTAACA -3'    |
| hnc-Myc Intron-2     | F:5'- TGCTTGGGAATGTGCTTTGC -3'<br>R:5'- AGCTGGGTTATGGCATGGAC -3'    |
| GAPDH<br>(NM_002046) | F:5'- TGA CTTCAACAGCGACACCCA -3'<br>R:5'- CACCCTGTTGCTGTAGCCAAA -3' |
